# Supplementary material for: Graphene prepared by gamma irradiation for corrosion protection of stainless steel 316 in chloride containing electrolytes
Source: Royal Society of Chemistry journal article supplement (doi:10.1039/c5ra11287g), 2015-01-01
Supplement: c5ra11287g1.pdf [file c5ra11287g1.pdf]

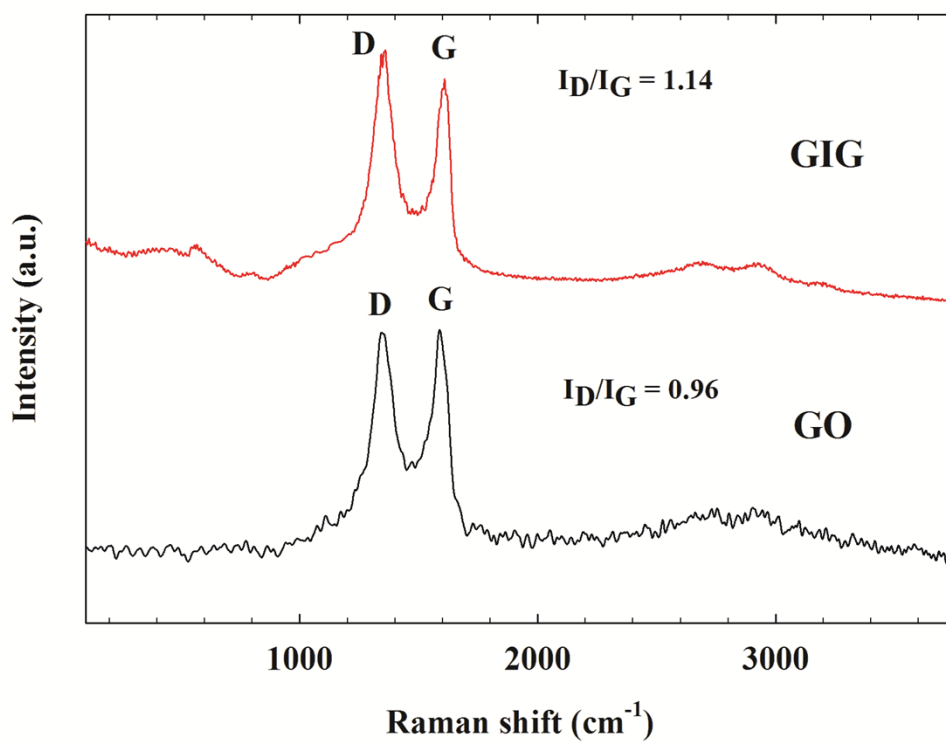

Supplement 1. Raman spectrum of pristine GIG

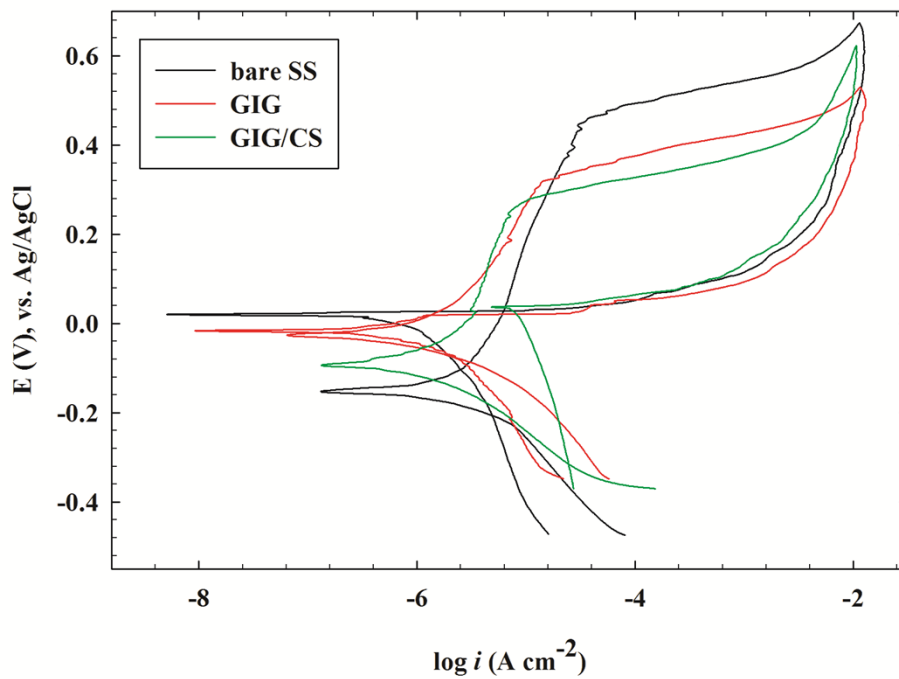

Supplement 2. Cyclic potentiodynamic curves indicating the pitting potential comparing bare, GIG-coated, GIG/CS-coated stainless steel (scan rate  $1 \text{ mV s}^{-1}$ ) in 3.5% NaCl

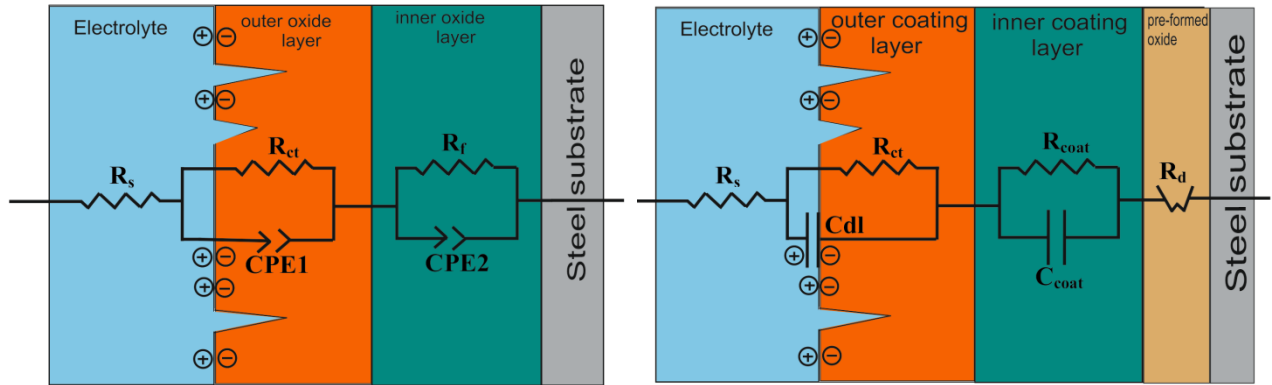

Supplement 3. Simulated equivalent circuits for the bare AISI 316 and the GIG-coated AISI 316
